# Supplementary material
Source: bioRxiv or medRxiv preprint supplement (https://www.biorxiv.org/highwire/filestream/104539/field_highwire_adjunct_files/0/343640-1.pdf)
Supplement: Supplementary file [file 343640-1.pdf]

## Supplementary Information

### Culturing the ubiquitous freshwater actinobacterial acI lineage by supplying a biochemical ‘helper’ catalase

Suhyun Kim, Innam Kang, Ji-Hui Seo, and Jang-Cheon Cho\*

Department of Biological Sciences, Inha University, Incheon 22212, Republic of Korea

\*Correspondence to: [chojc@inha.ac.kr](mailto:chojc@inha.ac.kr)

#### Supplementary Text

**Supplementary Figure 1.** Maximum-likelihood tree based on 16S rRNA gene sequences showing the phylogenetic position of strains IMCC25003 and IMCC26103.

**Supplementary Figure 2.** Revival and transfer cultures of strains IMCC25003 and IMCC26103.

**Supplementary Figure 3.** Growth curves of strains IMCC25003 (a) and IMCC26103 (b) obtained from the revival experiment of frozen glycerol stocks using the culture medium (FAMV+CM+AA) supplemented with catalase.

**Supplementary Figure 4.** Genome sequencing using the genomic DNA extracted from cultured and harvested cell pellets of the acI strains.

**Supplementary Figure 5.** Increase of IMCC25003 *katG* expression with increasing concentration of H<sub>2</sub>O<sub>2</sub> treatment.

**Supplementary Figure 6.** Expression, purification, and determination of native molecular weight of recombinant IMCC25003 KatG.

**Supplementary Figure 7.** Catalase and peroxidase activities of purified IMCC25003 KatG and bovine catalase (KatE).

**Supplementary Figure 8.** Kinetic curves of H<sub>2</sub>O<sub>2</sub> decomposition by IMCC25003 KatG and bovine catalase.

**Supplementary Figure 9.** Growth curves of strain IMCC25003 (a) and strain IMCC26103 (b) at varying temperature conditions.

**Supplementary Table 1.** Media used in this study and their composition.

**Supplementary Table 2.** Trials to establish pure culture of strain IMCC25003.

**Supplementary Table 3.** Kinetic parameters of various catalase-peroxidases and bovine catalase.

**Supplementary Table 4.** List of acI genomes used in this study and the presence or absence of *katG* gene.

**Supplementary Table 5.** Fatty acids composition (%) of two acI strains

#### Supplementary References

## Supplementary Text

### Description of two proposed '*Candidatus*' species

The average nucleotide identity (ANI) value calculated from genome sequences between strain IMCC25003 and '*Ca. Planktophilia sulfonica*' MMS-IA-56 was 84% and between strains MCC26103 and '*Ca. Planktophilia lacus*' MMS-21-148 was 78%, which were both below the 95~96% cut-off value for bacterial species demarcation<sup>1,2</sup>. The analysis of genomic DNA-DNA relatedness and differential phenotypic characteristics indicated that strains IMCC25003 and IMCC26103 each represent novel species of the genus '*Candidatus Planktophilia*'. Because the two strains, however, did not grow on a defined medium or a synthetic medium but replicated only in complex natural lake water media, hampering the deposition of the acI strains in culture collections, we propose the provisional names '*Candidatus Planktophilia rubra*' for strain IMCC25003 and '*Candidatus Planktophilia aquatilis*' for strain IMCC26103.

### '*Candidatus Planktophilia rubra*' (ru'bra. L. fem. adj. *rubra* reddish, pertaining to the reddish color of cells)

Represented by a cultured bacterial strain, IMCC25003. Gram-positive, aerobic, red-pigmented, non-motile, and chemoheterotrophic. Cells are curved rods with biovolume of 0.041  $\mu\text{m}^3$ , 0.46–1.23  $\mu\text{m}$  (average 0.68  $\mu\text{m}$ ) long and 0.25–0.37  $\mu\text{m}$  (average 0.30  $\mu\text{m}$ ) wide. Grows in FAMV+CM+AA supplemented with  $>0.5 \text{ U ml}^{-1}$  catalase but does not grow in any liquid medium devoid of catalase and on any solid agar medium. Growth occurs at 10–30°C (optimum, 25°C). No single carbon sources enhance the cellular growth. Requires sulfur-containing amino acids (methionine and cysteine) but prefers methionine. The major fatty acids ( $>10\%$ ) are summed feature 3 ( $\text{C}_{16:1} \omega 7c$  and/or  $\text{C}_{16:1} \omega 7c$ , 45.8%),  $\text{C}_{16:0}$  (23.1%), and  $\text{C}_{14:0}$  (18.2%). Strain IMCC25003 has a genome size of 1.354 Mbp with DNA G+C content of 49.1%. The complete genome sequence of strain IMCC25003 is available on GenBank (CP029557). Phylogenetically belongs to the acI-A1 tribe.

The representative strain IMCC25003 was isolated from a freshwater lake, Lake Soyang, Republic of Korea, using a dilution-to-extinction culturing.

'*Candidatus Planktophila aquatilis*' (a.qua.ti'lis. L. fem. adj. *aquatilis* living, growing, or found, in or near water, aquatic).

Represented by a cultured bacterial strain, IMCC26103. Gram-positive, aerobic, red-pigmented, non-motile, and chemoheterotrophic. Cells are curved rods with biovolume of  $0.061 \mu\text{m}^3$ ,  $0.49\text{--}1.23 \mu\text{m}$  (average  $0.88 \mu\text{m}$ ) long and  $0.22\text{--}0.39 \mu\text{m}$  (average  $0.31 \mu\text{m}$ ) wide. Grows in FAMV+CM+AA supplemented with  $>0.5 \text{ U ml}^{-1}$  catalase but does not grow in any liquid medium devoid of catalase and on any solid agar medium. Growth occurs at  $10\text{--}30^\circ\text{C}$  (optimum,  $25^\circ\text{C}$ ). D-ribose and D-glucose enhance the cellular growth. Requires sulfur-containing amino acids (methionine and cysteine) but prefers cysteine. The major fatty acids ( $>10\%$ ) are  $\text{C}_{16:0}$  (28.5%),  $\text{C}_{18:1} \omega 9c$  (25.8%), summed feature 3 ( $\text{C}_{16:1} \omega 7c$  and/or  $\text{C}_{16:1} \omega 7c$ , 12.3%), and  $\text{C}_{18:0}$  (10.5%). Strain IMCC26103 has a genome size of 1.457 Mbp with DNA G+C content of 47.0%. The complete genome sequence of strain IMCC26103 is available on GenBank (CP029558). Phylogenetically belongs to the acI-A4 tribe.

The representative strain IMCC26103 was isolated from a freshwater lake, Lake Soyang, Republic of Korea, using a dilution-to-extinction culturing.

## Supplementary Figures

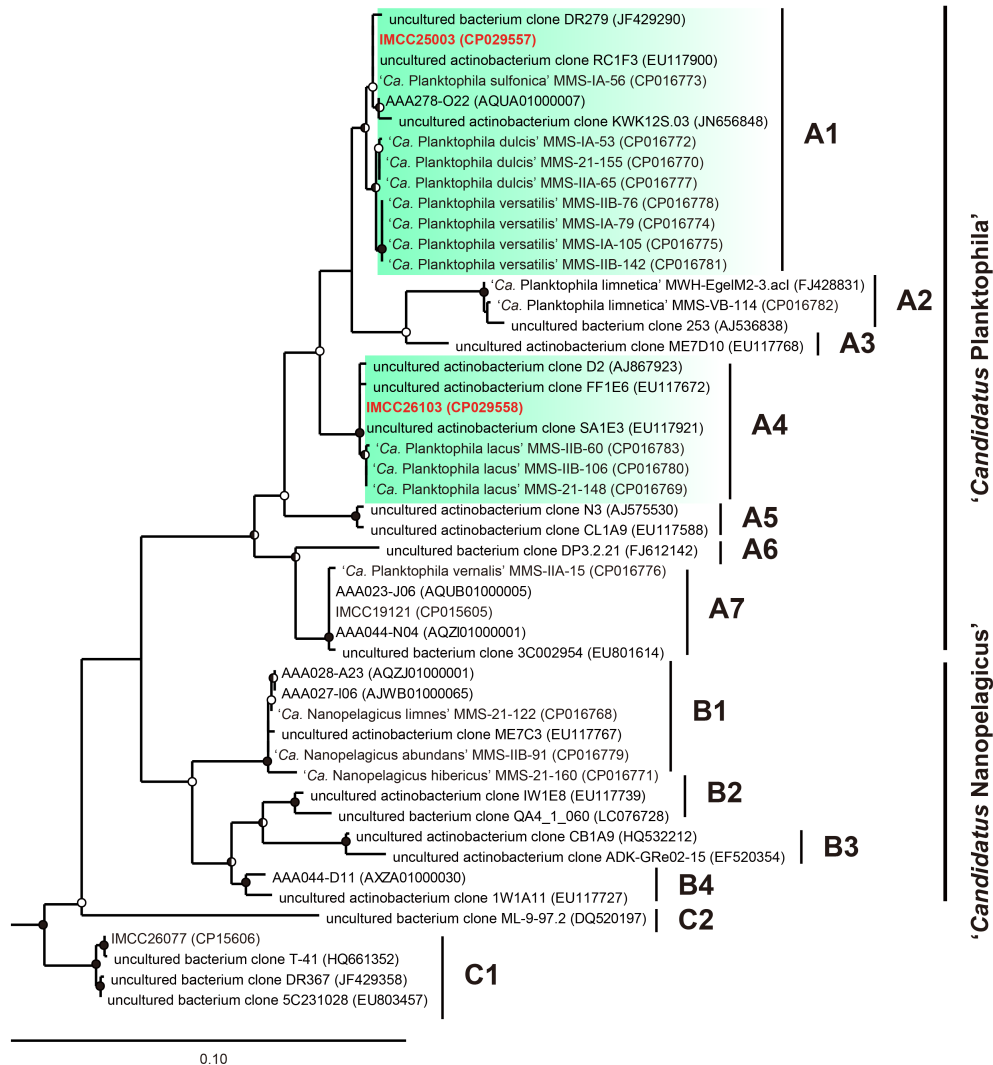

**Supplementary Figure 1.** Maximum-likelihood tree based on 16S rRNA gene sequences showing the phylogenetic position of strains IMCC25003 and IMCC26103. The two strains isolated in this study are marked in red. *Streptomyces sannanensis* (AB184579) and *Streptomyces griseus* (AY999909) were used as outgroup. Bootstrap supporting values (from 600 replicates) are shown at the nodes as filled circles ( $\geq 90\%$ ), half-filled circles ( $\geq 70\%$ ), and empty circles ( $\geq 50\%$ ). Bar, 0.10 substitutions per nucleotide position.

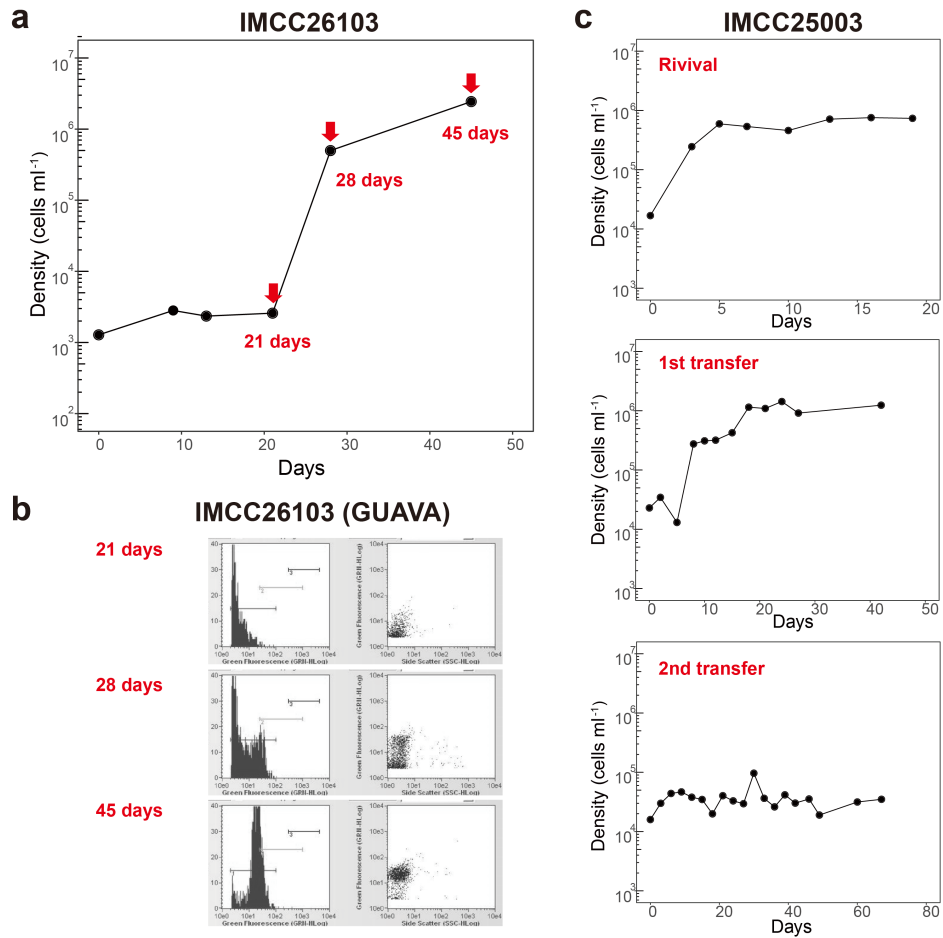

**Supplementary Figure 2.** Revival and transfer cultures of strains IMCC25003 and IMCC26103. (a) The growth curve of a revival culture of strain IMCC26103. (b) Flow cytometry plots of strain IMCC26103 obtained at the time points indicated in (a). Left, histograms showing the distribution of cell counts (y axis) according to the green fluorescence (x axis); Right, dot plots showing the distribution of cells according to side scatter (x axis) and green fluorescence (y axis). (c) Revival and two subsequent transfer cultures of strain IMCC25003.

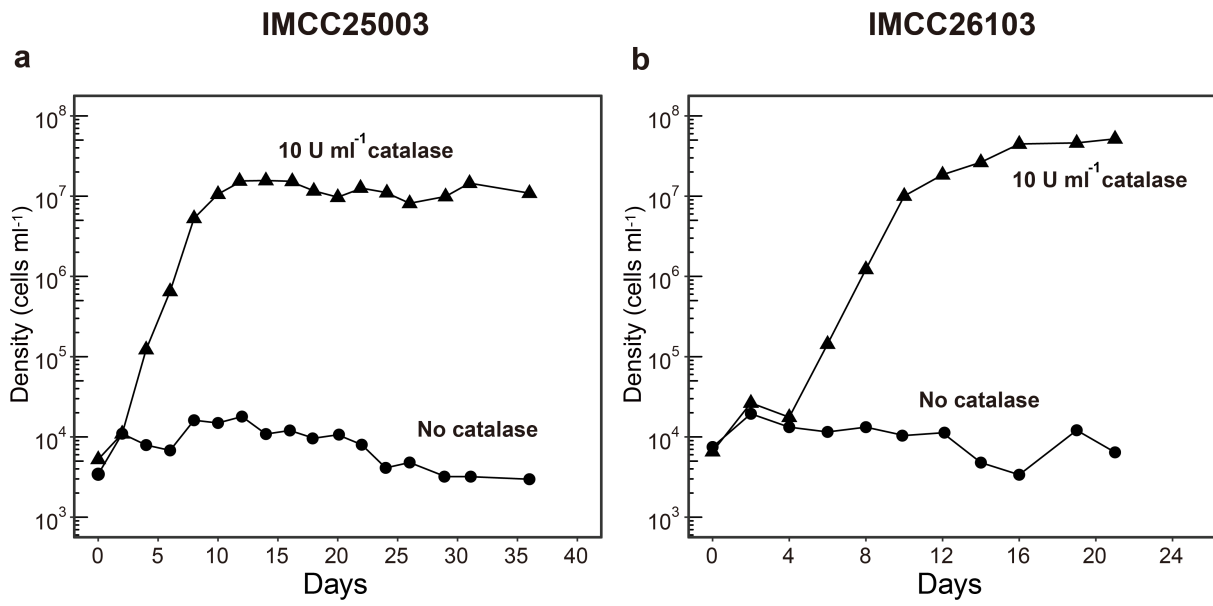

**Supplementary Figure 3.** Growth curves of strains IMCC25003 (a) and IMCC26103 (b) obtained from the revival experiment of frozen glycerol stocks using the culture medium (FAMV+CM+AA) supplemented with catalase. The triangle symbol represents growth in the medium amended with 10 U ml<sup>-1</sup> catalase, and the circle symbol represents growth in the medium without catalase.

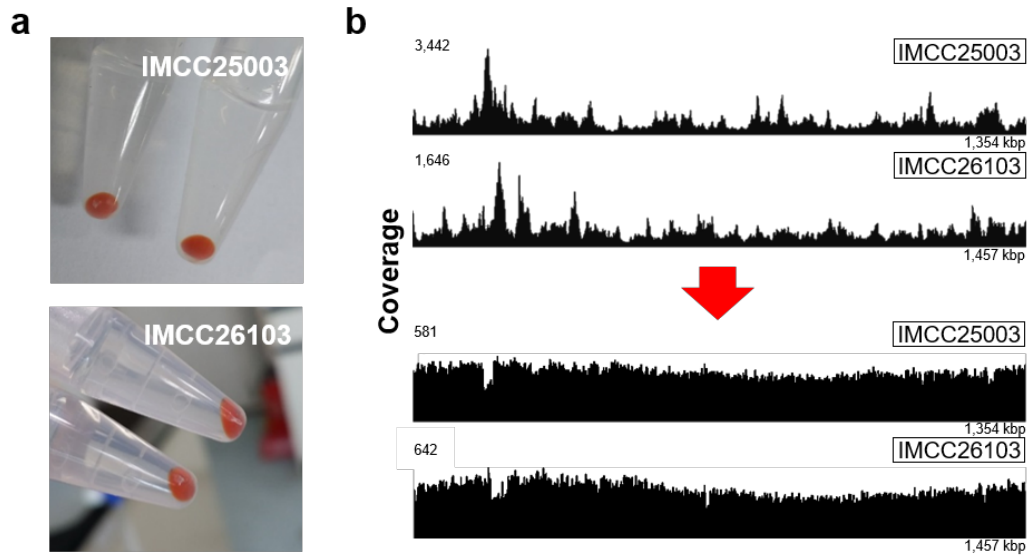

**Supplementary Figure 4.** Genome sequencing using the genomic DNA extracted from cultured and harvested cell pellets of the acI strains. (a) Cell pellets obtained by centrifugation from 4 L cultures of IMCC25003 (upper) and IMCC26103 (lower). Genomic DNA extracted from these cell pellets were used for genome sequencing. (b) Coverage variation across the complete genome sequences of the acI strains. The two coverage plots above red arrow were obtained from our previous study using whole genome amplification (WGA)<sup>3</sup>. The two coverage plots below the arrow were obtained from this study using large-scale cultures without WGA. Coverage variation was calculated using a 25-bp window based on read mapping. Bar heights were normalized in each plot and the maximum coverages are indicated at the upper left corner of each plot.

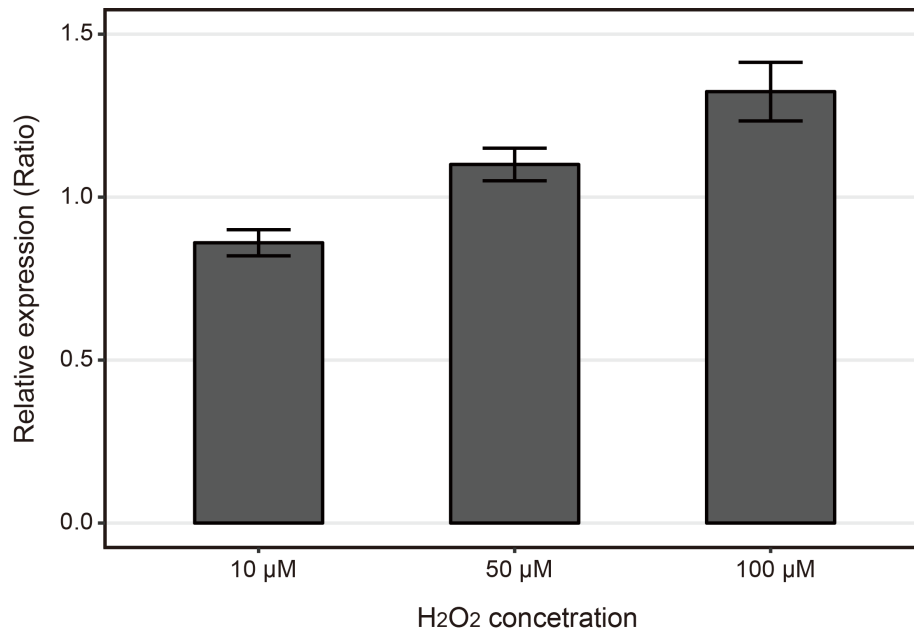

**Supplementary Figure 5.** Increase of IMCC25003 *katG* expression with increasing concentration of H<sub>2</sub>O<sub>2</sub> treatment. Cells of IMCC25003 were treated with 3 different H<sub>2</sub>O<sub>2</sub> concentrations (10 μM, 50 μM, and 100 μM) for 30 min and total RNA was used for the analysis of *katG* expression by qPCR. Expression level of *katG* in H<sub>2</sub>O<sub>2</sub>-treated cultures was compared with that in the control cultures (no H<sub>2</sub>O<sub>2</sub> treatment). FAMV+CM+AA was used as the culture medium. Error bars indicate standard deviations ( $n=3$ ).



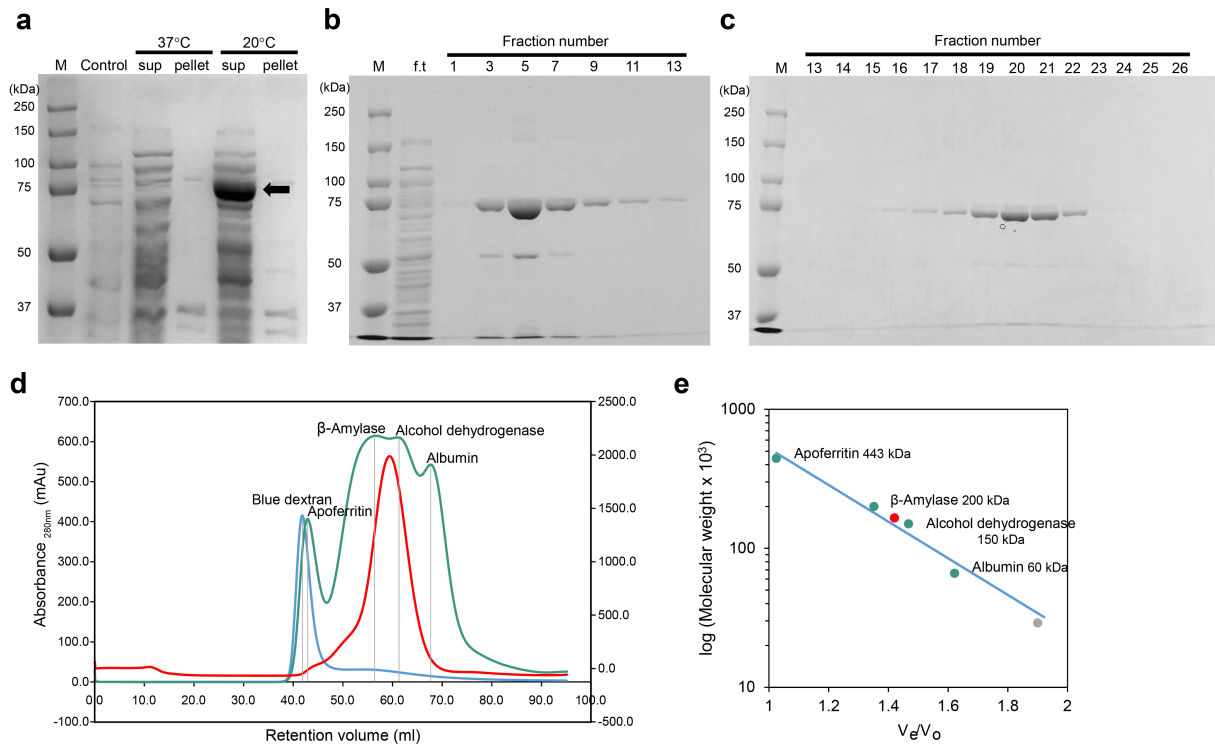

**Supplementary Figure 6.** Expression, purification, and determination of native molecular weight of recombinant IMCC25003 KatG. (a) Expression of IMCC25003 KatG in *E. coli* analyzed by SDS-PAGE. The bold arrow indicates a band of KatG, which is approximately 82.6 kDa. M, molecular weight size marker; control, before induction of expression; sup, supernatant; pellet, cell debris and membrane. Purified IMCC25003 KatG bound to a Ni<sup>2+</sup>-nitrilotriacetic acid affinity column (b) and the purified protein through a size exclusion superpose-12 column (c), confirmed by SDS-PAGE. M, molecular weight size marker; f.t., unbound flow through fraction. Chromatograms (d) of protein-molecular-weight size markers and IMCC25003 KatG, and the molecular-weight calibration curve (e) obtained from protein-molecular-weight size markers and IMCC25003 KatG. The chromatogram colored in red and the red dot on the calibration curve represent IMCC25003 KatG.

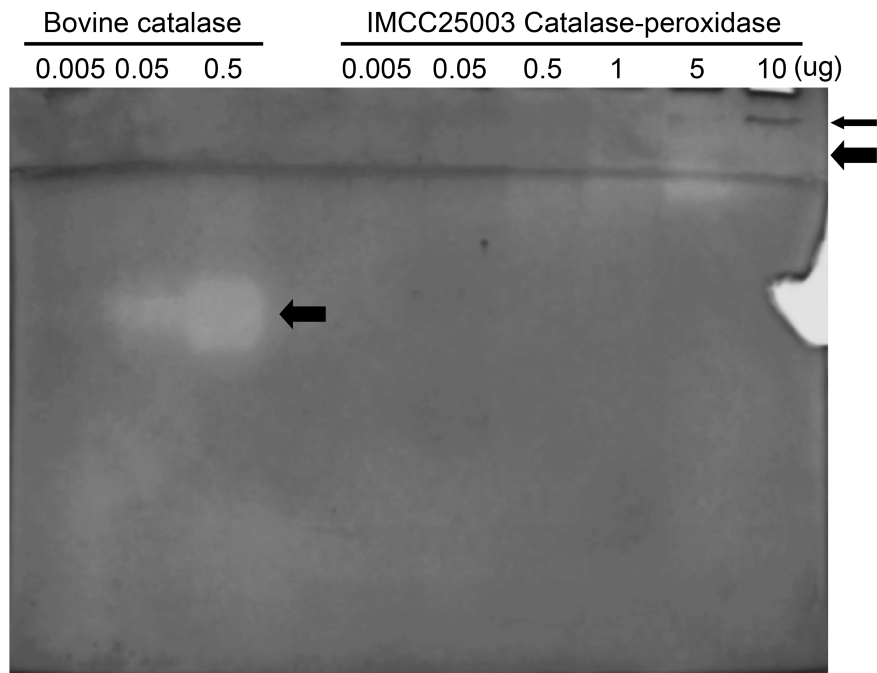

**Supplementary Figure 7.** Catalase and peroxidase activities of purified IMCC25003 KatG and bovine catalase (KatE). Bovine catalase [0.005 (0.01 unit), 0.05 (0.1 unit), and 0.5 (1 unit)  $\mu\text{g}$ ] and IMCC25003 KatG (0.005, 0.05, 0.5, 1, 5, and 10  $\mu\text{g}$ ) of IMCC25003 KatG were separated by 8% non-denaturing PAGE. The bold arrows indicate negatively stained catalase activity and the narrow arrow indicates peroxidase activity stained by 3,3',5,5'-tetramethylbenzidine.

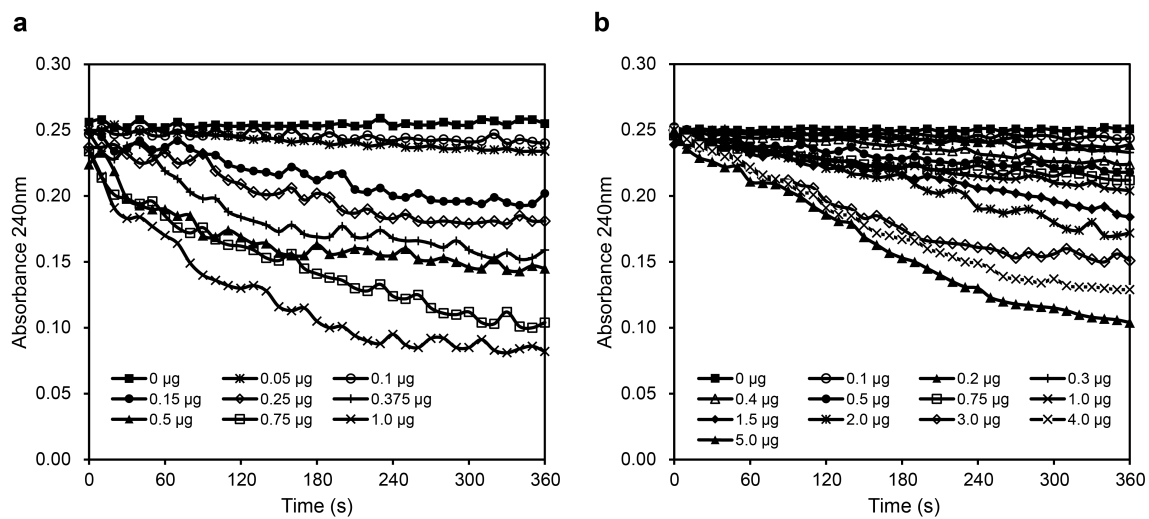

**Supplementary Figure 8.** Kinetic curves of H<sub>2</sub>O<sub>2</sub> decomposition by IMCC25003 KatG and bovine catalase. The curves of absorbance at 240 nm over time were generated using varying quantities of (a) bovine catalase (0–1.0 µg) and (b) IMCC25003 KatG (0–5.0 µg).

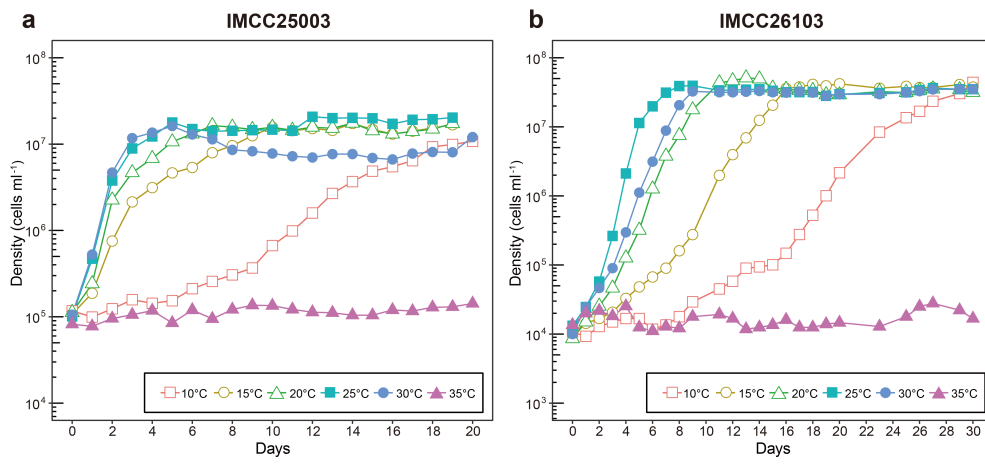

**Supplementary Figure 9.** Growth curves of strain IMCC25003 (a) and strain IMCC26103 (b) at varying temperature conditions.

## Supplementary Tables

**Supplementary Table 1.** Media used in this study and their composition.

| <b>Components of media</b>               |                                                                                 |                     |
|------------------------------------------|---------------------------------------------------------------------------------|---------------------|
| Components (abbreviation)                | Compound(s)                                                                     | Final concentration |
| Ammonium (N)                             | NH <sub>4</sub> Cl                                                              | 10 μM               |
| Phosphate (P)                            | KH <sub>2</sub> PO <sub>4</sub>                                                 | 10 μM               |
| Trace metals (TM)                        | FeCl <sub>3</sub> ·6H <sub>2</sub> O                                            | 117 nM              |
|                                          | MnCl <sub>2</sub> ·4H <sub>2</sub> O                                            | 9 nM                |
|                                          | ZnSO <sub>4</sub> ·7H <sub>2</sub> O                                            | 800 pM              |
|                                          | CoCl <sub>2</sub> ·6H <sub>2</sub> O                                            | 500 pM              |
|                                          | Na <sub>2</sub> MoO <sub>4</sub> ·2H <sub>2</sub> O                             | 300 pM              |
|                                          | Na <sub>2</sub> SeO <sub>3</sub>                                                | 1 nM                |
|                                          | NiCl <sub>2</sub> ·6H <sub>2</sub> O                                            | 1 nM                |
| Vitamin mixture (V)                      | Thiamine·HCl                                                                    | 59 nM               |
|                                          | Niacin                                                                          | 81 nM               |
|                                          | Ca-Pantothenate                                                                 | 84 nM               |
|                                          | Pyridoxine                                                                      | 59 nM               |
|                                          | Biotin                                                                          | 409 pM              |
|                                          | Folic acid                                                                      | 453 pM              |
|                                          | Vitamin B12                                                                     | 70 pM               |
|                                          | Myo-inositol                                                                    | 555 nM              |
|                                          | <i>p</i> -Aminobenzoic Acid                                                     | 7 nM                |
| Carbon mixture (CM)                      | Pyruvate                                                                        | 50 μM               |
|                                          | D-Glucose                                                                       | 5 μM                |
|                                          | <i>N</i> -Acetyl-D-glucosamine                                                  | 5 μM                |
|                                          | D-Ribose                                                                        | 5 μM                |
|                                          | Methyl alcohol                                                                  | 5 μM                |
| 20 proteinogenic amino acid mixture (AA) | Each amino acid                                                                 | 100 nM, each        |
| <b>Media definition</b>                  |                                                                                 |                     |
| Media                                    | Definition                                                                      |                     |
| FAM                                      | 0.2 μm-filtered and autoclaved freshwater medium supplemented with N, P, and TM |                     |
| FAMV                                     | FAM supplemented with V                                                         |                     |
| FAMV+CM                                  | FAMV supplemented with CM                                                       |                     |
| FAMV+AA                                  | FAMV supplemented with AA                                                       |                     |
| FAMV+CM+AA                               | FAMV supplemented with CM and AA                                                |                     |

**Supplementary Table 2.** Trials to establish pure culture of strain IMCC25003.

| Trial       | Media composition         | Additional substrate                        | Reference         |
|-------------|---------------------------|---------------------------------------------|-------------------|
| 1st attempt | FAMV                      |                                             |                   |
|             | FAMV+CM                   |                                             |                   |
|             | FAMV+AA                   | 0.5×, 1×, 5×, and 10× of CM                 |                   |
|             | AFM <sup>a</sup> +V+CM+AA |                                             |                   |
|             | FM <sup>b</sup> +V+CM+AA  |                                             |                   |
| 2nd attempt | FAMV+CM+AA                | 20 µM acetate                               | [4]               |
|             |                           | 20 µM oxaloacetate                          | [5]               |
|             |                           | 20 µM putrescine                            | [5,6]             |
|             |                           | 20 µM glycerol                              | [5]               |
|             |                           | 20 µM xylose                                | [6,7]             |
|             |                           | 1 mg L <sup>-1</sup> proteose peptone No. 3 |                   |
|             |                           | 1 mg L <sup>-1</sup> yeast extract          |                   |
| 3rd attempt | FAMV+CM+AA                | 1:20 diluted spent medium <sup>c</sup>      | [6,8], This study |
| 4th attempt | FAMV+CM+AA                | 10 U ml <sup>-1</sup> catalase              |                   |

<sup>a</sup>AFM, Artificial freshwater medium<sup>9</sup>. <sup>b</sup>FM, 0.1 µm-filtered but non-autoclaved freshwater medium. <sup>c</sup>Spent medium, a spent medium of the genus *Limnohabitans* filtrated through 0.1 µm pore-size membrane after cultivation of *Limnohabitans* sp. IMCC26003. For the media abbreviations, refer to Supplementary Table 1.

**Supplementary Table 3.** Kinetic parameters of various catalase-peroxidases and bovine catalase.

| Source                                               | Molecular weight | Structure | Specific activity (Units mg <sup>-1</sup> ) | Km (mM) | kcat (s <sup>-1</sup> ) | kcat/Km (M <sup>-1</sup> s <sup>-1</sup> ) | pI               | Reference  |
|------------------------------------------------------|------------------|-----------|---------------------------------------------|---------|-------------------------|--------------------------------------------|------------------|------------|
| IMCC25003 <sup>a</sup>                               | 165,000          | A2        | 179.3                                       | 11.7    | 9.05 × 10 <sup>2</sup>  | 8.01 × 10 <sup>4</sup>                     | 7.6 <sup>b</sup> | This study |
| <i>Archaeoglobus fulgidus</i> <sup>a</sup>           | NA               | NA        | 5,280                                       | 3.8     | 7.77 × 10 <sup>3</sup>  | 2.04 × 10 <sup>6</sup>                     | 5.6 <sup>b</sup> | [10]       |
| <i>Bacillus selenatarsenatis</i> SF-1                | 165,000          | A2        | 3,375                                       | 2.6     | 1.15 × 10 <sup>4</sup>  | 4.41 × 10 <sup>6</sup>                     | 6.0              | [11]       |
| <i>Burkholderia pseudomalleri</i> <sup>a</sup>       | NA               | NA        | 3,630                                       | 4.5     | 5.68 × 10 <sup>3</sup>  | 1.26 × 10 <sup>6</sup>                     | 5.9 <sup>b</sup> | [10]       |
| <i>Escherichia coli</i> K10                          | 337,000          | A4        | 1,486.5                                     | 3.9     | 1.63 × 10 <sup>4</sup>  | 4.19 × 10 <sup>6</sup>                     | 5.1 <sup>b</sup> | [12]       |
| <i>Escherichia coli</i> O157:H7                      | NA               | NA        | NA                                          | 4.0     | 1.40 × 10 <sup>4</sup>  | 3.50 × 10 <sup>6</sup>                     | 5.1 <sup>b</sup> | [13]       |
| <i>Geobacillus stearothermophilus</i> <sup>a</sup>   | NA               | NA        | 3,120                                       | 4.4     | 1.40 × 10 <sup>3</sup>  | 3.18 × 10 <sup>5</sup>                     | 5.2              | [14]       |
| <i>Halobacterium salinarum</i>                       | 240,000          | A4        | 43.2                                        | 3.7     | NA                      | NA                                         | 3.8              | [15]       |
| <i>Mycobacterium smegmatis</i>                       | NA               | NA        | NA                                          | 1.4     | 2.38 × 10 <sup>3</sup>  | 1.70 × 10 <sup>6</sup>                     | 5.0 <sup>b</sup> | [16]       |
| <i>Mycobacterium tuberculosis</i> <sup>a</sup>       | 175,000          | A2        | 2,420                                       | 5.2     | 1.01 × 10 <sup>4</sup>  | 1.94 × 10 <sup>6</sup>                     | 5.1              | [17]       |
| <i>Rhodobacter capsulatus</i>                        | 236,000          | A4        | 7,800                                       | 4.2     | NA                      | NA                                         | 4.5              | [18]       |
| <i>Rhodobacter capsulatus</i> <sup>a</sup>           | NA               | NA        | 4,830                                       | 3.7     | 6.64 × 10 <sup>3</sup>  | 1.79 × 10 <sup>6</sup>                     | 5.1 <sup>b</sup> | [10]       |
| <i>Synechococcus elongatus</i> PCC 6301 <sup>a</sup> | 165,000          | A2        | 1,491                                       | 4.8     | 8.85 × 10 <sup>3</sup>  | 1.84 × 10 <sup>6</sup>                     | 4.6              | [19]       |
| <i>Synechococcus elongatus</i> PCC 6301              | 165,000          | A2        | NA                                          | 4.3     | 7.20 × 10 <sup>3</sup>  | 1.67 × 10 <sup>6</sup>                     | 5.1 <sup>b</sup> | [20]       |
| <i>Synechococcus elongates</i> PCC 7942 <sup>a</sup> | NA               | NA        | NA                                          | 4.2     | 2.60 × 10 <sup>4</sup>  | 6.19 × 10 <sup>6</sup>                     | 5.1 <sup>b</sup> | [21]       |
| <i>Synechocystis</i> sp. PCC 6803 <sup>a</sup>       | 170,000          | A2        | 5,420                                       | 4.9     | 3.50 × 10 <sup>3</sup>  | 7.14 × 10 <sup>2</sup>                     | 5.4              | [22]       |
| <i>Thermoascus aurantiacus</i>                       | 330,000          | A4        | NA                                          | 48.0    | 1.07 × 10 <sup>5</sup>  | 2.22 × 10 <sup>6</sup>                     | 4.5              | [23]       |
| <i>Thermus brockianus</i>                            | 178,000          | A4        | 5,300                                       | 35.5    | 6.00 × 10 <sup>3</sup>  | 1.69 × 10 <sup>5</sup>                     | 4.7              | [24]       |
| <i>Bos taurus</i> <sup>c</sup>                       | 240,000          | A4        | 1980.3                                      | 20.6    | 9.05 × 10 <sup>4</sup>  | 8.01 × 10 <sup>4</sup>                     | 5.4              | This study |

<sup>a</sup>Biochemical properties were determined using recombinant catalase-peroxidase. <sup>b</sup>Theoretical pI values were estimated based on amino acids sequences. <sup>c</sup>The monofunctional bovine catalase which was amended to culture media of IMCC25003 was used as an experimental positive control. NA, not available.

**Supplementary Table 4.** List of *acI* genomes used in this study and the presence or absence of *katG* gene.

| Tribe                                      | Organism name                             | Genome ID               | Isolation site    | Complete | No. of Scaffolds | Genome size (bp) | Length of KatG (aa) |
|--------------------------------------------|-------------------------------------------|-------------------------|-------------------|----------|------------------|------------------|---------------------|
| A1                                         | Actinobacteria bacterium IMCC25003        | 2602042019 <sup>a</sup> | Lake Soyang       | O        | 1                | 1,353,947        | 746                 |
|                                            | actinobacterium SCGC AAA278-O22           | 2236661007 <sup>a</sup> | Lake Mendota      | X        | 43               | 1,138,490        | X                   |
|                                            | actinobacterium SCGC AAA027-M14           | 2236661003 <sup>a</sup> | Lake Mendota      | X        | 22               | 822,296          | 725                 |
|                                            | 'Ca. Planktophilia dulcis' MMS-IIA-65     | CP016777 <sup>b</sup>   | Lake Zurich       | O        | 1                | 1,348,019        | 732                 |
|                                            | 'Ca. Planktophilia dulcis' MMS-IA-53      | CP016772 <sup>b</sup>   | Lake Zurich       | O        | 1                | 1,365,934        | 732                 |
|                                            | 'Ca. Planktophilia dulcis' MMS-21-155     | CP016770 <sup>b</sup>   | Lake Zurich       | O        | 1                | 1,361,776        | 732                 |
|                                            | 'Ca. Planktophilia sulfonica' MMS-IA-56   | CP016773 <sup>b</sup>   | Lake Zurich       | O        | 1                | 1,344,614        | 747                 |
|                                            | 'Ca. Planktophilia versatilis' MMS-IIB-76 | CP016778 <sup>b</sup>   | Lake Zurich       | O        | 1                | 1,325,420        | 733                 |
|                                            | 'Ca. Planktophilia versatilis' MMS-IA-79  | CP016774 <sup>b</sup>   | Lake Zurich       | O        | 1                | 1,331,009        | 733                 |
|                                            | 'Ca. Planktophilia versatilis' MMS-IA-105 | CP016775 <sup>b</sup>   | Lake Zurich       | O        | 1                | 1,326,591        | 733                 |
| 'Ca. Planktophilia versatilis' MMS-IIB-142 | CP016781 <sup>b</sup>                     | Lake Zurich             | O                 | 1        | 1,266,983        | 733              |                     |
| A2                                         | 'Ca. Planktophilia limnetica' MMS-VB-114  | CP016782 <sup>b</sup>   | Lake Zurich       | O        | 1                | 1,328,793        | 722                 |
| A4                                         | Actinobacteria bacterium IMCC26103        | 2602042020 <sup>a</sup> | Lake Soyang       | O        | 1                | 1,456,516        | X                   |
|                                            | 'Ca. Planktophilia lacus' MMS-IIB-106     | CP016780 <sup>b</sup>   | Lake Zurich       | O        | 1                | 1,384,812        | 721                 |
|                                            | 'Ca. Planktophilia lacus' MMS-IIB-60      | CP016783 <sup>b</sup>   | Lake Zurich       | O        | 1                | 1,410,107        | 721                 |
|                                            | 'Ca. Planktophilia lacus' MMS-21-148      | CP016769 <sup>b</sup>   | Lake Zurich       | O        | 1                | 1,460,061        | 721                 |
| A5                                         | actinobacterium SCGC AAA044-O16           | 2606217200 <sup>a</sup> | NA                | X        | 17               | 1,313,698        | 718                 |
|                                            | actinobacterium SCGC AAA028-G02           | 2606217191 <sup>a</sup> | NA                | X        | 18               | 1,231,401        | 718                 |
| A6                                         | actinobacterium SCGC AAA028-E20           | 2602042080 <sup>a</sup> | NA                | X        | 19               | 727,714          | X                   |
|                                            | actinobacterium SCGC AAA028-I14           | 2619618809 <sup>a</sup> | NA                | X        | 11               | 623,569          | 717                 |
| A7                                         | Actinobacteria bacterium IMCC19121        | 2606217181 <sup>a</sup> | Lake Soyang       | O        | 1                | 1,506,415        | X                   |
|                                            | actinobacterium SCGC AAA044-N04           | 2236661005 <sup>a</sup> | Damariscotta Lake | X        | 23               | 1,286,658        | 718                 |
|                                            | actinobacterium SCGC AAA024-D14           | 2264265190 <sup>a</sup> | Sparkling Lake    | X        | 82               | 778,696          | X                   |
|                                            | actinobacterium SCGC AAA023-J06           | 2236661001 <sup>a</sup> | Sparkling Lake    | X        | 98               | 695,943          | X                   |
|                                            | 'Ca. Planktophilia vernalis' MMS-IIA-15   | CP016776 <sup>b</sup>   | Lake Zurich       | O        | 1                | 1,364,004        | 718                 |



|    |                                          |                         |                   |   |    |           |     |
|----|------------------------------------------|-------------------------|-------------------|---|----|-----------|-----|
| B1 | actinobacterium SCGC AAA027-L06          | 2505679121 <sup>a</sup> | Lake Mendota      | X | 75 | 1,163,583 | X   |
|    | actinobacterium SCGC AAA027-J17          | 2236661002 <sup>a</sup> | Lake Mendota      | X | 81 | 966,755   | X   |
|    | actinobacterium SCGC AAA278-I18          | 2236661006 <sup>a</sup> | Damariscotta Lake | X | 54 | 944,397   | X   |
|    | actinobacterium SCGC AAA028-A23          | 2236661004 <sup>a</sup> | Lake Mendota      | X | 64 | 833,294   | X   |
|    | actinobacterium SCGC AAA023-D18          | 2236661009 <sup>a</sup> | Sparkling Lake    | X | 67 | 753,259   | X   |
|    | actinobacterium SCGC AB141-P03           | 2236876028 <sup>a</sup> | Lake Stechlin     | X | 66 | 660,403   | X   |
|    | 'Ca. Nanopelagicus limnes' MMS-21-122    | CP016768 <sup>b</sup>   | Lake Zurich       | O | 1  | 1,238,108 | X   |
|    | 'Ca. Nanopelagicus hibericus' MMS-21-160 | CP016771 <sup>b</sup>   | Lake Zurich       | O | 1  | 1,223,088 | X   |
|    | 'Ca. Nanopelagicus abundans' MMS-IIB-91  | CP016779 <sup>b</sup>   | Lake Zurich       | O | 1  | 1,161,863 | X   |
| B4 | actinobacterium SCGC AAA044-D11          | 2619618811 <sup>a</sup> | NA                | X | 18 | 1,095,756 | 719 |
| C1 | Actinobacteria bacterium IMCC26077       | 2602042021 <sup>a</sup> | Lake Soyang       | O | 1  | 1,551,612 | X   |

<sup>a</sup>IMG Genome ID (IMG Taxon ID). <sup>b</sup>GenBank accession number. NA, not available.

**Supplementary Table 5.** Fatty acids composition (%) of two acI strains.

| Fatty acid                                                              | IMCC25003 | IMCC26103 |
|-------------------------------------------------------------------------|-----------|-----------|
| Saturated fatty acids                                                   |           |           |
| C10:0                                                                   |           | 0.46      |
| C12:0                                                                   | 1.64      | 7.93      |
| C14:0                                                                   | 18.22     | 7.85      |
| C16:0                                                                   | 23.11     | 28.45     |
| C17:0                                                                   |           | 1.05      |
| C18:0                                                                   | 2.14      | 10.49     |
| Unsaturated fatty acids                                                 |           |           |
| C15:1 $\omega$ 6 <i>c</i>                                               | 1.11      |           |
| C17:1 $\omega$ 8 <i>c</i>                                               | 2.31      | 1.35      |
| C18:1 $\omega$ 9 <i>c</i>                                               | 2.10      | 25.80     |
| summed feature 3 (16:1 $\omega$ 7 <i>c</i> /16:1 $\omega$ 6 <i>c</i> )  | 45.79     | 12.28     |
| summed feature 5 (18:2 $\omega$ 6,9 <i>c</i> /18:0 ante)                |           | 0.99      |
| summed feature 8 (18:1 $\omega$ 7 <i>c</i> , 18:1 $\omega$ 6 <i>c</i> ) | 3.58      | 3.36      |

## Supplementary References

1. Konstantinidis, K. T. & Tiedje, J. M. Genomic insights that advance the species definition for prokaryotes. *Proc. Natl. Acad. Sci. USA*. **102**, 2567-2572 (2005).
2. Kim, M., Oh, H. S., Park, S. C. & Chun, J. Towards a taxonomic coherence between average nucleotide identity and 16S rRNA gene sequence similarity for species demarcation of prokaryotes. *Int. J. Syst. Evol. Microbiol.* **64**, 346-351 (2014).
3. Kang, I., Kim, S., Islam, M. R. & Cho, J.-C. The first complete genome sequences of the acI lineage, the most abundant freshwater *Actinobacteria*, obtained by whole-genome-amplification of dilution-to-extinction cultures. *Sci. Rep.* **7**, 42252 (2017).
4. Buck, U., Grossart, H.-P., Amann, R. & Pernthaler, J. Substrate incorporation patterns of bacterioplankton populations in stratified and mixed waters of a humic lake. *Environ. Microbiol.* **11**, 1854-1865 (2009).
5. Ghylis, T. W. et al. Comparative single-cell genomics reveals potential ecological niches for the freshwater acI *Actinobacteria* lineage. *ISME J* **8**, 2503-2516 (2014).
6. Garcia, S. L., McMahon, K. D., Grossart, H.-P. & Warnecke, F. Successful enrichment of the ubiquitous freshwater acI *Actinobacteria*. *Environ. Microbiol. Rep.* **6**, 21-27 (2014).
7. Garcia, S. L. et al. Metabolic potential of a single cell belonging to one of the most abundant lineages in freshwater bacterioplankton. *ISME J* **7**, 137-147 (2013).
8. Jezbera, J., Sharma, A. K., Brandt, U., Doolittle, W. F. & Hahn, M. W. 'Candidatus Planktophilia limnetica', an actinobacterium representing one of the most numerically important taxa in freshwater bacterioplankton. *Int. J. Syst. Evol. Microbiol.* **59**, 2864-2869 (2009).
9. Kim, S., Kang, I. & Cho, J. C. Genomic Analysis of a Freshwater Actinobacterium, "Candidatus Limnosphaera aquatica" Strain IMCC26207, Isolated from Lake Soyang. *J. Microbiol. Biotechnol.* **27**, 825-833 (2017).
10. Singh, R. et al. Comparative study of catalase-peroxidases (KatGs). *Arch. Biochem. Biophys.* **471**, 207-214 (2008).

11. Gudelj, M. et al. A catalase-peroxidase from a newly isolated thermoalkaliphilic *Bacillus* sp. with potential for the treatment of textile bleaching effluents. *Extremophiles* **5**, 423-429 (2001).
12. Claiborne, A. & Fridovich, I. Purification of the o-dianisidine peroxidase from *Escherichia coli* B. Physicochemical characterization and analysis of its dual catalatic and peroxidatic activities. *J. Biol. Chem.* **254**, 4245-4252 (1979).
13. Varnado, C. L., Hertwig, K. M., Thomas, R., Roberts, J. K. & Goodwin, D. C. Properties of a novel periplasmic catalase-peroxidase from *Escherichia coli* O157 : H7. *Arch. Biochem. Biophys.* **421**, 166-174 (2004).
14. Kobayashi, C. et al. Thermal conversion from low- to high-activity forms of catalase I from *Bacillus stearothermophilus*. *J. Biol. Chem.* **272**, 23011-23016 (1997).
15. Brownpeterson, N. J. & Salin, M. L. Purification of a catalase-peroxidase from *Halobacterium halobium*: characterization of some unique properties of the halophilic enzyme. *J. Bacteriol.* **175**, 4197-4202 (1993).
16. Marcinkeviciene, J. A., Magliozzo, R. S. & Blanchard, J. S. Purification and characterization of the *Mycobacterium smegmatis* catalase-peroxidase involved in isoniazid activation. *J. Biol. Chem.* **270**, 22290-22295 (1995).
17. Johnsson, K., Froland, W. A. & Schultz, P. G. Overexpression, purification, and characterization of the catalase-peroxidase KatG from *Mycobacterium tuberculosis*. *J. Biol. Chem.* **272**, 2834-2840 (1997).
18. Hochman, A. & Shemesh, A. Purification and characterization of a catalase-peroxidase from the photosynthetic bacterium *Rhodospseudomonas capsulata*. *J. Biol. Chem.* **262**, 6871-6876 (1987).
19. Engleder, M. et al. Nucleotide sequence analysis, overexpression in *Escherichia coli* and kinetic characterization of *Anacystis nidulans* catalase-peroxidase. *Biochimie* **82**, 211-219 (2000).
20. Obinger, C., Regelsberger, G., Strasser, G., Burner, U. & Peschek, G. A. Purification and characterization of a homodimeric catalase-peroxidase from the cyanobacterium *Anacystis nidulans*. *Biochem. Biophys. Res. Commun.* **235**, 545-552 (1997).
21. Mutsuda, M., Ishikawa, T., Takeda, T. & Shigeoka, S. The catalase-peroxidase of *Synechococcus* PCC 7942: purification, nucleotide sequence analysis and expression in *Escherichia coli*. *Biochem. J.* **316**, 251-257 (1996).

22. Jakopitsch, C. et al. Catalase-peroxidase from the cyanobacterium *Synechocystis* PCC 6803: cloning, overexpression in *Escherichia coli*, and kinetic characterization. *Biol. Chem.* **380**, 1087-1096 (1999).
23. Wang, H. X., Tokusige, Y., Shinoyama, H., Fujii, T. & Urakami, T. Purification and characterization of a thermostable catalase from culture broth of *Thermoascus aurantiacus*. *J. Ferment. Bioeng.* **85**, 169-173 (1998).
24. Thompson, V. S., Schaller, K. D. & Apel, W. A. Purification and characterization of a novel thermo-alkali-stable catalase from *Thermus brockianus*. *Biotechnol. Prog.* **19**, 1292-1299 (2003).
